# Supplementary material for: ﻿Three new species of Diploderma Hallowell, 1861 (Squamata, Agamidae) from the Hengduan Mountain Region, south-western China
Source: Zookeys. 2022 Nov 22;1131:1–30. doi: 10.3897/zookeys.1131.86644 (PMC9836577; doi:10.3897/zookeys.1131.86644)
Supplement: Supplementary material 1 — Uncorrected genetic pairwise distances (p-distances) (%) between species based on the mitochondrial ND2 gene sequences [file zookeys-1131-001_article-86644__-s001.xls]

## Sheet: Sheet1
		1	2	3	4	5	6	7	8	9	10	11	12	13	14	15	16	17	18	19	20	21	22	23	24	25	26	27	28	29	30	31	32	33	34
1	Diploderma angustelinea
2	Diploderma aorun	8.4
3	Diploderma batangense	8.4	8.1
4	Diploderma bowoense	9.1	9.4	8.6
5	Diploderma brevicauda	6.9	5.3	8.7	8.9
6	Diploderma brevipes	18.9	20.2	19.9	19.4	18.6
7	Diploderma chapaense	14.5	14.2	15.3	13.6	14.3	18.3
8	Diploderma drukdaypo	7	5	8.6	9.4	4.3	18.8	13.8
9	Diploderma dymondi	18.9	19.1	18.8	19.8	18.6	16	18.7	18.5
10	Diploderma flaviceps	18.8	19.2	18.8	19.5	17.7	18.7	18.6	17.9	18.7
11	Diploderma flavilabre	10	10.9	10	10	9.3	19.6	14.5	9.6	18.7	19.2
12	Diploderma formosgulae	6.9	5.5	8.7	9.5	4.6	19.5	14.6	3.2	18.9	18.2	9.5
13	Diploderma iadinum	17.3	17.6	15.7	17.9	16.3	18.1	15.1	16.5	17.9	18.2	16.6	17
14	Diploderma laeviventre	17.9	18.5	17.3	19.4	16.7	20.3	14.9	16.9	21.6	21	18.5	17.1	19.7
15	Diploderma luei	18.7	21.1	21.8	21.2	19.5	10.8	19.8	19.4	16	17.8	21.1	19.7	20.1	22.8
16	Diploderma makii	20.3	22.6	21.8	21.6	21	13.7	19.1	21	16.2	19.6	22.2	21.6	20.7	23.6	10.8
17	Diploderma menghaiense	14.6	14.5	13	15.2	13.1	18.3	8.8	13.4	17.7	17.4	14.3	13.6	14.9	15.8	19.2	20.8
18	Diploderma micangshanense	17.7	18.3	16.9	17	16.6	16.2	14.9	17	11.7	16.6	17	17.3	16.8	18.9	14.8	15.3	16
19	Diploderma panchi	7.9	5.1	8.1	9.8	5.3	20.5	15.8	5	19.3	18.7	10.2	4.8	17.5	17.8	21.2	23.3	15	17.8
20	Diploderma panlong	17.6	18.4	17.2	18.3	16.3	16.1	19	16.8	11.8	15.7	17.7	17	16.9	19.9	15.6	18.1	17.4	11.5	17.2
21	Diploderma polygonatum	19.5	21.9	20.5	19.9	20.4	14.1	18.6	19.6	15.9	18.3	20.5	20.5	18.8	21.3	13.7	14.5	18	15.1	21.8	15.9
22	Diploderma qilin	7.1	5.8	8.4	9	4.1	19.7	14.5	5.1	19.3	18.5	9.6	5	17.6	17.1	19.7	21.4	13.3	17.4	5.8	17.6	21
23	Diploderma slowinskii	17.4	17	16.4	17.8	15.9	20.9	16.4	16.2	19.5	20.9	17.3	16.3	17.7	15.8	21.1	21.5	15.1	16.4	16.9	20.1	20.9	17.6
24	Diploderma splendidum	18.8	19.8	18.2	18.4	17.9	16.5	18.2	18.4	16.7	13.9	18.8	18.3	18.2	21.2	16.9	16.3	17.8	14.8	19.4	14.9	16.2	19.3	20.3
25	Diploderma swild	17	17.9	16.3	17.7	15.9	16.4	15.5	16.5	12.1	15.8	16.4	16.3	17.1	19	14.5	17.5	15.9	12.8	16.9	10.1	17.2	16.9	17	15
26	Diploderma swinhonis	19.2	20.6	19.3	18.8	19.3	15.5	17	19.2	15.5	16.6	20.3	18.2	16.5	19.6	14.5	17.4	17.8	14.5	21.4	14.1	14.3	20.6	20.7	15	15.1
27	Diploderma varcoe	18.1	18.8	18.7	18.4	17.2	17.3	18.7	17.6	9	17.7	17.3	17.9	17.3	19.6	16.9	18.2	17.3	11.3	18	11.1	16.6	18	20.6	16.1	12.1	15.9
28	Diploderma vela	7.2	5.2	6.9	9.2	4.9	18	13.6	2.6	17.7	18.5	9.7	3.3	16.2	16.7	18.7	20.6	12.9	16.7	5.5	16.8	18.9	4.7	15.9	18.2	16.4	18.9	17.4
29	Diploderma yangi	17.7	18.4	18.4	19.6	16.7	21.1	16	17.2	22.5	20.8	19	17.8	19.9	6.4	22.5	21.5	16	18.4	18.2	19.7	20.7	17.1	15	21.2	19.6	20.7	19.9	17
30	Diploderma yulongense	7.9	8.3	8.2	9.6	6.9	19.1	14.5	7.4	19.6	19.1	10.3	7.3	17.7	18	19.8	20.3	14.5	17.8	8.7	18	19.9	7.7	16.5	18.9	17.9	19.6	18	8.1	17.6
31	Diploderma yunnanense	14.4	14.4	14.4	13.5	13.4	17.9	6.3	13	18.3	19.6	14.8	13.6	16	16.8	20.3	19.6	9.1	16.4	15.3	18.1	19.7	13.7	17.2	18.4	16.4	18.1	17.4	12.5	17.1	14
32	Diploderma zhaoermii	18.8	19	17.2	18.5	18	16.5	15.2	18.8	12.2	17.9	18.2	18.2	17.6	19.3	16.1	16.5	17.1	10.1	18.2	11.7	15.4	18.7	17.2	15.8	12.4	14.1	13	18.1	19.4	18.9	17.5
33	Diploderma limingense sp. nov.	7.8	5.9	8.5	9.8	4.1	20.8	15.9	4.5	19.6	19.1	10.9	5.3	17.6	18.1	20.8	21.7	15	18	5.1	18.1	22	5	17.5	19.3	17.2	20.8	18.5	4.9	18.8	8.2	14.7	19.3
34	Diploderma shuoquense sp. nov.	8.6	9	9.7	6.3	8.2	20.3	14.6	8.5	19.4	19.6	9.8	8.6	17.5	19	20.8	20.6	13.9	17.5	9.5	17.6	20.6	8.5	16.7	18.2	16.2	19.8	17.5	8.6	18.7	9.4	14.5	17.9	8.5
35	Diploderma yongshengense sp. nov.	8.7	9.3	8.4	11	8.5	19.6	14.6	8.7	19.1	18.9	11.3	8.3	17.3	18.6	20.2	20.9	15.1	18.2	9.3	17.6	20.9	8.4	17.4	19.5	17.5	20.7	18.2	8.6	18.9	5.8	15.3	18.5	8.7	9.4
